# Supplementary material for: Maraviroc for Previously Treated Patients with R5 HIV-1 Infection
Source: Atypon-hosted journal article supplement (doi:10.1056/nejmoa0803152), 2008-10-01
Supplement: nejm_gulick_1429sa1.pdf [file nejm_gulick_1429sa1.pdf]

## Supplementary Appendix

This appendix has been provided by the authors to give readers additional information about their work.

Supplement to: Gulick RM, Lalezari J, Goodrich J, et al. Maraviroc for previously treated patients with R5 HIV-1 infection. *N Engl J Med* 2008;359:1429-41.

## **WEB-ONLY SUPPLEMENT**

### **Methods:**

Due to an administrative error, two randomized patients in MOTIVATE 2 received incorrect study treatment for 4 weeks, one randomized to maraviroc twice-daily received placebo and one randomized to placebo received maraviroc twice-daily. Efficacy results were qualitatively similar including or removing these patients from the analyses.

A single pre-planned 24-week analysis of safety and efficacy was conducted by the study team and reviewed by the independent Data and Safety Monitoring Board who recommended that the study should continue unchanged.

## **Acknowledgments:**

### **MOTIVATE 1 SITE INVESTIGATORS**

#### **Canada**

Jonathan Angel, Brian Conway, Kevin A. Gough, Richard G. Lalonde, Francois Laplante, Roger P. Leblanc, Julio S.G. Montaner, Anita R. Rachlis, Barbara Romanowski, Stuart J. Rosser, Ethan Rubinstein, Stephen David Shafran, Fiona Smail, Cecile Tremblay, Benoit Trottier, Sylvie Trottier, Christos Tsoukas, Sharon Lynn Walmsley

#### **United States of America**

Alen Voskanian, Bisher Akil, Roberto Claudio Arduino, David Asmuth, George William Beatty, Stephen Lawrence Becker, Nicholaos C. Bellos, Sky Robert Blue, Robert Key Bolan, John D. Brand, George Ghazaros Burnazian, Alfred F. Burnside, Thomas B. Campbell, Rafael E. Campo, Kathleen King Casey, Paul Joseph Cimoch, Calvin J. Cohen, Gregg Oscar Coodley, Roberto B. Corales, Edwin DeJesus, Leslie E. Diaz, George L. Drusano, Jerome A. Ernst, Judith E. Feinberg, Lawrence Edward Feldman, Steven M. Fine, Jason Andrew Flamm, Stephen Eliot Follansbee, Todd Allen Fralich, Emanuel Gallant, Eliot Warren Godofsky, Gary Green, Paula Rosa Greiger-Zanlungo, Barbara Marie Gripshover, Richard K. Groger, Roy Gulick, William David Hardy, Shawn K. Hassler, Richard Harold Haubrich, Stephen P. Hauptman, David Holden Henry, William Keith Henry, Jose Norberto Hernandez, Charles Byron Hicks, Michael Alan Horberg, Joseph G. Jemsek, Allan Rowan Kelly, Clifford A. Kinder, Daniel Benjamin Klein, Laura Kogelman, Jacob Paul Lalezari, Anthony LaMarca, Harry William Lampiris, Matthew Leibowitz, Jason Mark Leider, Jeffrey Lloyd Lennox, Ralph Liporace, Harold Luther Martin, Lucia M. Martinez-Bejar., Claudia Martorell, Joseph P. McGowan, Donna Mildvan, Steven Miles, Ronald Takeshi Mitsuyasu, Javier Osvaldo Morales-Ramirez, Anne B. Morris, Karam Chucri Mounzer, Robert Anderson Myers, Jeffrey P. Nadler, Daniel Pearce, Gerald Pierone, Bruce Stephen Rashbaum, Jayashree Ravishankar, Robert Ray Redfield, Richard Craig Reichman, William Jay Robbins, Stockton Edward Roberts, Jorge E. Rodriguez, Michael Saag, Kunthavi Sathasivam, Paul Edward Sax, Lawrence E. Schwartz, Sorana Segal-Maurer, Michael Grant Sension, Gladys E. Sepulveda-Arzola, Paul Richard Skolnik, Louis Marshall Sloan, Robert P. Smith, James Michael Sosman, Jack Thomas Stapleton, Roy Steigbigel, Corklin R. Steinhart, Donna Elaine Sweet, Susan Swindells, Pablo Tebas, Melanie Ann Thompson, Silver Sisneros, William James Towner, Peter Gordon. Trevor N. Hawkins, David Allen Wheeler, Sally Williams, Dean Wilcox, Steven Williams, Todd Stephen Wills, Michael Bruce Wohlfeiler, David Wright, Angela Xavier, Bienvenido Gamulo Yangco, Barry Stephen Zingman, Carmen D. Zorrilla

### **MOTIVATE 2 SITE INVESTIGATORS**

#### **Australia**

Anthony M. Allworth, Mark T. Bloch, Neil J. Bodsworth, John Chuah, David Cooper, Nicholas Doong, Dominic Dwyer, Julian Gold, Jennifer Frances Hoy, Richard J. Moore, Norman J. Roth, Cassy Workman

#### **Belgium**

Nathan Clumeck, Patricia Dellot, Jean Christophe Goffard, Michel Moutschen,  
Bernard C. Vandercam, Dirk Vogelaers

### **Canada**

Danielle Rouleau

### **France**

Michele Bentata, Laurent Cotte, Jean-Francois Delfraissy, Jacques Durant, Pierre-  
Marie Girard, Laurent Hocqueloux, Roland Landman, Alain Lafeuillade, Isabelle  
Poizot Martin, Jean-Michel Molina, Gilles Pialoux, Christophe Piketty, Francois Raffi,  
Jacques Reynes, Renaud Verdon

### **Germany**

Keikawus Arasteh, Johannes Richard Bogner, Norbert H. Brockmeyer, Stefan  
Esser, Gerd Fätkenheuer, Frank-Detlef Goebel, Thomas Harrer, Peter Kern,  
Heribert Knechten, Jan van Lunzen, Markus Mueller, Antonius Mutz, Mark Oette,  
Andreas Plettenberg, Juergen Rockstroh, Jorg-Andres Rump, Reinhold E. Schmidt,  
Lothar Schneider, Dieter Schuster, Schlomo Staszewski, Hans-Juergen Stellbrink,  
Andreas Trein, Lutwinus Weitner

### **Italy**

Fernando Aiuti, Dante Bassetti, Antonio Di Biagio, Pietro Caramello, Giampiero  
Carosi, Roberto Esposito, Adriano Lazzarin, Francesco Leoncini, Paolo Emilio  
Manconi, Francesco Mazzotta, Francesco Montella, Enzo Raise, Vincenzo Vullo

### **Netherlands**

Ilija Mohandas Hoepelman, Rosalinde Maria Perenboom, J. M. Prins, Clemens  
Richter, Marchina Elisabeth Van Der Ende

### **Poland**

Marek Beniowski, Anna Boron-Kaczmarska, Robert Flisiak, Waldemar Halota,  
Andrzej Horban, Tomasz Mach, Tomasz Smiatacz

### **Spain**

Fernando Lozano de Leon, Pompeyo Viciano Fernandez, Rafael Rubio Garcia,  
Jose Josep Gatell Artigas, Juan Julian Gonzalez Garcia, Felix Gutierrez, Juan  
Gonzalez Lahoz, Jose Iribarren Loyarte, Santiago Moreno, Federico Pulido Ortega,  
Pere Domingo Pedrol, Antonio Rivero, Bonaventura Clotet, Cristina Sarria

### **Sweden**

Magnus Gisslen, Leo Flamholz, Anders Karlsson

### **Switzerland**

Manuel Battegay, Enos Bernasconi, Matthias Cavassini, Henning Drechsler,  
Bernard Hirschel, Milos Opravil, Pietro Vernazza

### **United Kingdom**

Philippa Jane Easterbrook, Martin Fisher, Philip Hay, Margaret A. Johnson, Clifford  
L. Leen, Mark R. Nelson, Edmund Ong, Jonathan N. Weber, David J. White,  
Edmund Wilkins, Martin Wiselka

**United States**

Ana Maria Alvarez-Jacinto, Diana Antoniskis, Barbara A. Atkinson, Daniel S. Berger, Gary Blick, Robert Owen Brenna, Jeffrey Howard Burack, L. W. Preston Church, Patrick G. Clay, Paul Peniston Cook, Catherine Maria Creticos, Patrick William Daly, Getachew Feleke, Thomas Mc Donald File, Jeffrey Eliot Galpin, Stephen Lloyd Green, Frances Fae Haas, Barbara J. Hanna, Chiu-Bin Hsiao, Ricky K. Hsu, Robert S. Jones, Peter Kadlecik, Robert Charles Kalayjian, Robert H. Keller, Shubha Kerkar, Janak Koirala, Leon Liang-Yu Lai, Sujata Lalla-Reddy, Rodger David Macarthur, Gregory John Malanoski, Norman Peter Markowitz, Patrick L. McLeroth, Alexander A. McMeeking, Goran Miljkovic, John Buscemi Montana, Daniel Edward Nixon, Dorece G. Norris, Jesse Pullen Penico, Leonel Perez-Limonte, Lynette H. Posorske, David James Prelutsky, James Riddell, Barry Michael Rodwick, Peter Jerome Ruane, James Sampson, Steven Santiago, Amy Seinfeld, Victoria Lee Sharp, Zaher Shebib, Mark Leslie Tanner, Joseph G. Timpone, Barbara H. Wade, Frances Wallach, Winkler Weinberg, Christine Zurawski

**Supplemental Table 1: Grade 3/4 Laboratory Events (combined MOTIVATE 1 & 2 data)\***

|                                      |                                                   | Placebo + OBT | Maraviroc QD + OBT | Maraviroc BID + OBT |
|--------------------------------------|---------------------------------------------------|---------------|--------------------|---------------------|
|                                      |                                                   | N=207         | N=408              | N=421               |
| <b>Clinical Chemistry</b>            |                                                   |               |                    |                     |
| glucose (fasting): hypoglycemia      | Grade 3 (30-39 mg/dL)                             | 0             | 1 (0.2%)           | 0                   |
|                                      | Grade 4 (<30 mg/dL)                               | 0             | 0                  | 0                   |
| amylase                              | Grade 3 (>2.0–5.0x ULN)                           | 12 (5.8%)     | 26 (6.4%)          | 24 (5.7%)           |
|                                      | Grade 4 (>5.0x ULN)                               | 0             | 3 (0.7%)           | 1 (0.2%)            |
| lipase                               | Grade 3 (>2.0–5.0x ULN)                           | 7 (7.7%)      | 13 (7.7%)          | 8 (5.0%)            |
|                                      | Grade 4 (>5.0x ULN)                               | 0             | 1 (0.6%)           | 2 (1.3%)            |
| <b>Electrolytes</b>                  |                                                   |               |                    |                     |
| sodium (hypernatremia)               | Grade 3 (158-165 mEq/L)                           | 0             | 0                  | 0                   |
|                                      | Grade 4 (>165 mEq/L)                              | 0             | 0                  | 0                   |
| sodium (hyponatremia)                | Grade 3 (116-122 mEq/L)                           | 0             | 1 (0.2%)           | 1 (0.2%)            |
|                                      | Grade 4 (<116 mEq/L)                              | 0             | 0                  | 0                   |
| potassium (hyperkalemia)             | Grade 3 (6.6-7 mEq/L)                             | 0             | 1 (0.2%)           | 0                   |
|                                      | Grade 4 (>7.0 mEq/L)                              | 0             | 0                  | 0                   |
| potassium (hypokalemia)              | Grade 3 (2-2.4 mEq/L)                             | 0             | 1 (0.2%)           | 0                   |
|                                      | Grade 4 (<2 mEq/L)                                | 0             | 0                  | 0                   |
| calcium <sup>†</sup> (hypercalcemia) | Grade 3 (12.6-13.5 mg/dL)                         | 0             | 0                  | 0                   |
|                                      | Grade 4 (>13.5 mg/dL)                             | 0             | 0                  | 0                   |
| calcium <sup>†</sup> (hypocalcemia)  | Grade 3 (6.1-6.9 mg/dL)                           | 0             | 2 (0.5%)           | 2 (0.5%)            |
|                                      | Grade 4 (<6.1 mg/dL)                              | 1 (0.5%)      | 0                  | 0                   |
| <b>Hematology</b>                    |                                                   |               |                    |                     |
| hemoglobin                           | Grade 3 (6.5-6.9 g/dL)                            | 0             | 1 (0.2%)           | 1 (0.2%)            |
|                                      | Grade 4 (<6.5 g/dL)                               | 0             | 2 (0.5%)           | 1 (0.2%)            |
| platelets                            | Grade 3 (20-49 10 <sup>3</sup> /mm <sup>3</sup> ) | 2 (1.0%)      | 2 (0.5%)           | 1 (0.2%)            |
|                                      | Grade 4 (<20 10 <sup>3</sup> /mm <sup>3</sup> )   | 0             | 0                  | 0                   |
| absolute neutrophil count            | Grade 3 (500-749/mm <sup>3</sup> )                | 5 (2.4%)      | 6 (1.5%)           | 13 (3.1%)           |
|                                      | Grade 4 (<500/mm <sup>3</sup> )                   | 0             | 3 (0.7%)           | 5 (1.2%)            |
| <b>Renal Function</b>                |                                                   |               |                    |                     |
| creatinine                           | Grade 3 (>3x-6x ULN)                              | 1 (0.5%)      | 3 (0.7%)           | 1 (0.2%)            |
|                                      | Grade 4 (>6x ULN)                                 | 0             | 0                  | 0                   |

\* Irrespective of baseline grade. There was no evidence of significant differences among study arms. Comparisons are post-hoc and unadjusted for duration of treatment exposure or multiple testing.

<sup>†</sup> corrected for albumin

OBT, optimized background therapy; x, times; ULN, upper limit of normal

**Supplemental Table 2: Grade 1-4 hepatic laboratory test abnormalities (combined MOTIVATE 1 & 2 data)\***

|                                 |         | <b>Placebo+ OBT<br/>N=207</b> | <b>Maraviroc QD<br/>+ OBT<br/>N=408</b> | <b>Maraviroc BID<br/>+ OBT<br/>N=421</b> |
|---------------------------------|---------|-------------------------------|-----------------------------------------|------------------------------------------|
| <b>AST</b>                      | Grade 1 | 77 (37%)**                    | 125 (31%)**                             | 110 (26%)**                              |
|                                 | Grade 2 | 17 (8%)                       | 34 (8%)                                 | 44 (10%)                                 |
|                                 | Grade 3 | 6 (3%)                        | 12 (3%)                                 | 14 (3%)                                  |
|                                 | Grade 4 | 0                             | 4 (1%)                                  | 6 (1%)                                   |
| <b>ALT</b>                      | Grade 1 | 63 (30%)                      | 120 (29%)                               | 103 (24%)                                |
|                                 | Grade 2 | 15 (7%)**                     | 20 (5%)**                               | 43 (10%)**                               |
|                                 | Grade 3 | 6 (3%)                        | 16 (4%)                                 | 7 (2%)                                   |
|                                 | Grade 4 | 1 (0.5%)                      | 2 (0.5%)                                | 4 (1%)                                   |
| <b>bilirubin (total)</b>        | Grade 1 | 18 (9%)                       | 34 (8%)                                 | 36 (9%)                                  |
|                                 | Grade 2 | 22 (11%)                      | 35 (9%)                                 | 32 (8%)                                  |
|                                 | Grade 3 | 8 (4%)                        | 28 (7%)                                 | 21 (5%)                                  |
|                                 | Grade 4 | 3 (1%)                        | 5 (1%)                                  | 2 (0.5%)                                 |
| <b>alkaline<br/>phosphatase</b> | Grade 1 | 24 (12%)                      | 52 (13%)                                | 45 (11%)                                 |
|                                 | Grade 2 | 1 (0.5%)                      | 13 (3%)                                 | 11 (3%)                                  |
|                                 | Grade 3 | 0                             | 1 (0.2%)                                | 1 (0.2%)                                 |
|                                 | Grade 4 | 0                             | 1 (0.2%)                                | 0                                        |

**AST, ALT and Alkaline Phosphatase**

Grade 1:  $\geq 1.25x - \leq 2.5x$  ULN  
 Grade 2:  $> 2.5x - \leq 5.0x$  ULN  
 Grade 3:  $> 5.0x - \leq 10.0x$  ULN  
 Grade 4:  $> 10.0x$  ULN

**Bilirubin**

Grade 1:  $> 1.0x - \leq 1.5x$  ULN  
 Grade 2:  $> 1.5x - \leq 2.5x$  ULN  
 Grade 3:  $> 2.5x - \leq 5.0x$  ULN  
 Grade 4:  $> 5.0x$  ULN

\* Irrespective of baseline grade. There was no evidence of significant differences among study arms, except as noted. Comparisons are post-hoc and unadjusted for duration of treatment exposure or multiple testing.

\*\* P=0.02

OBT, optimized background regimen; AST, aspartate aminotransferase; ALT, alanine aminotransferase; x, times; ULN, upper limit of normal

## Supplemental Figure 2: Treatment Responses over 48 Weeks\*

### (A) HIV-1 RNA Suppression †

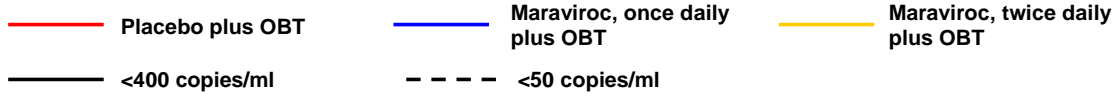

#### MOTIVATE 1

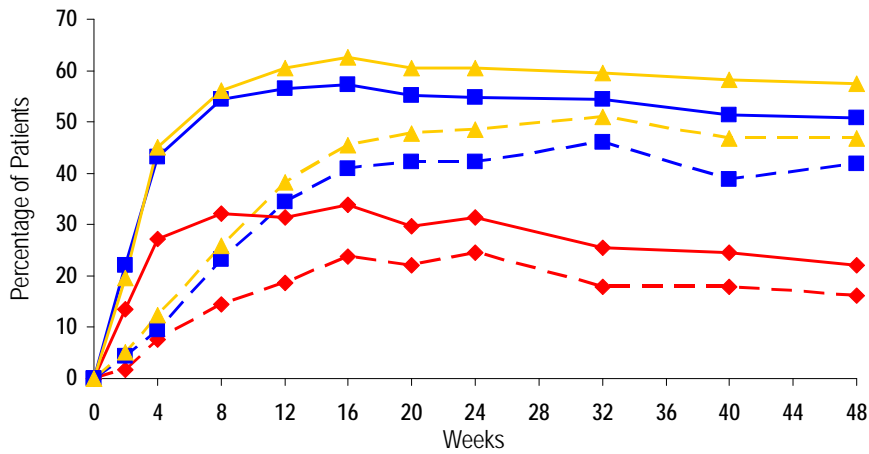

|         |    |     |     |     |     |     |     |     |     |     |     |
|---------|----|-----|-----|-----|-----|-----|-----|-----|-----|-----|-----|
| PBO     | n= | 118 | 115 | 111 | 95  | 71  | 59  | 58  | 50  | 46  | 42  |
| MVC QD  | n= | 232 | 223 | 217 | 202 | 182 | 176 | 166 | 157 | 152 | 143 |
| MVC BID | n= | 232 | 223 | 217 | 209 | 191 | 178 | 172 | 164 | 160 | 152 |

#### MOTIVATE 2

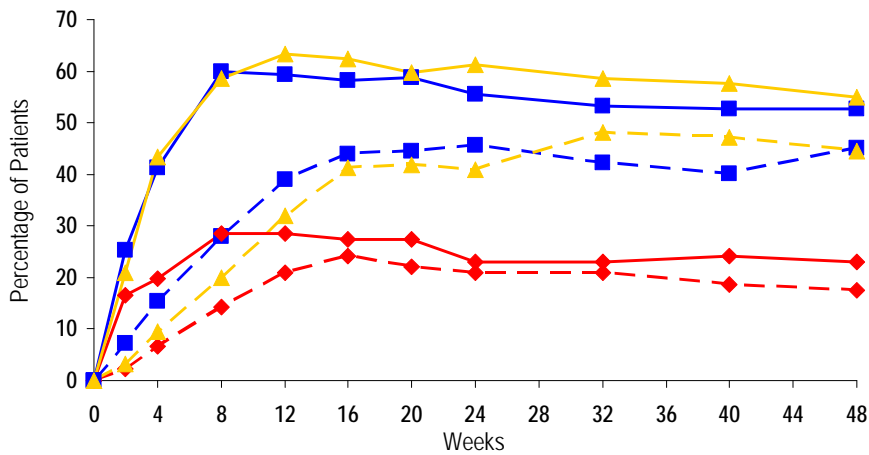

|         |    |     |     |     |     |     |     |     |     |     |     |
|---------|----|-----|-----|-----|-----|-----|-----|-----|-----|-----|-----|
| PBO     | n= | 91  | 90  | 82  | 77  | 56  | 48  | 40  | 34  | 32  | 30  |
| MVC QD  | n= | 182 | 176 | 173 | 166 | 150 | 137 | 130 | 125 | 119 | 113 |
| MVC BID | n= | 191 | 179 | 181 | 170 | 150 | 140 | 142 | 133 | 126 | 129 |

## (B) Time to Protocol-Defined Treatment Failure

— Placebo plus OBT     
 — Maraviroc, once daily plus OBT     
 — Maraviroc, twice daily plus OBT

### MOTIVATE 1

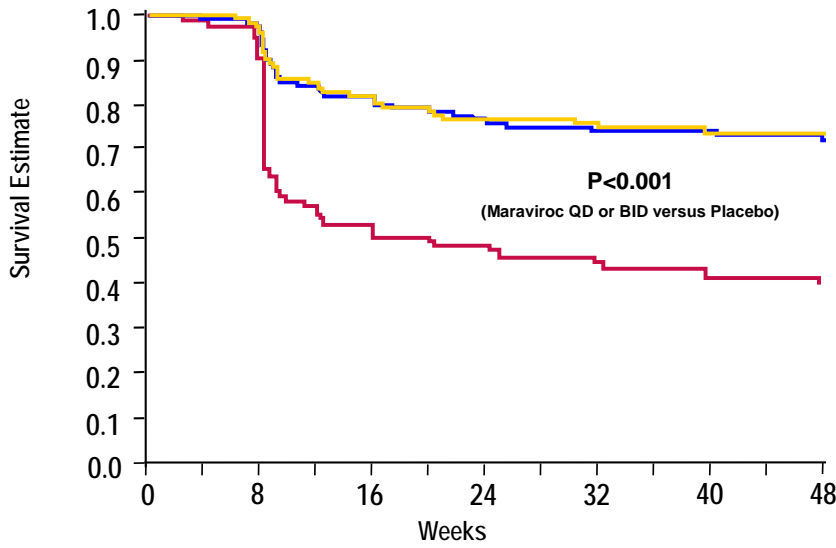

|         |    |     |     |     |     |     |     |     |     |     |     |     |     |     |
|---------|----|-----|-----|-----|-----|-----|-----|-----|-----|-----|-----|-----|-----|-----|
| PBO     | n= | 118 | 114 | 103 | 64  | 58  | 54  | 52  | 49  | 48  | 43  | 43  | 39  | 33  |
| MVC QD  | n= | 232 | 226 | 214 | 183 | 176 | 169 | 161 | 157 | 153 | 150 | 146 | 142 | 115 |
| MVC BID | n= | 235 | 224 | 215 | 188 | 179 | 171 | 166 | 163 | 160 | 158 | 157 | 151 | 119 |

### MOTIVATE 2

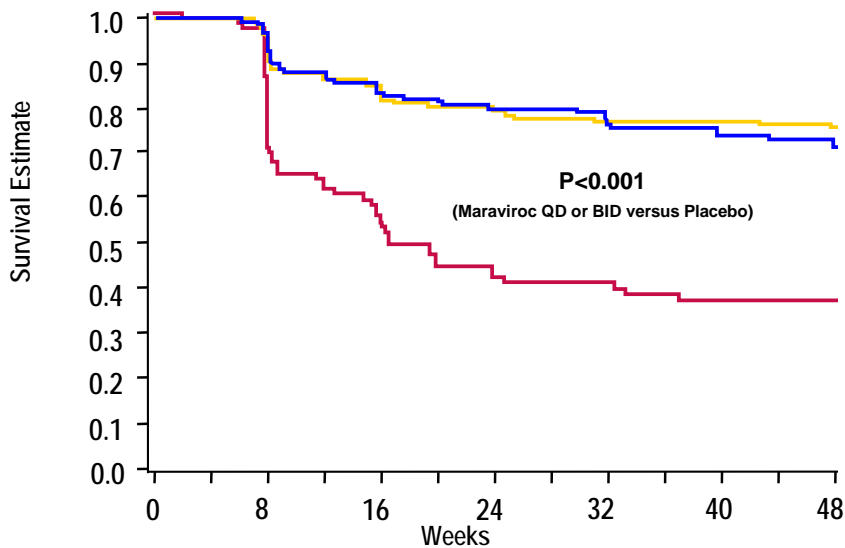

|         |    |     |     |     |     |     |     |     |     |     |     |     |     |     |
|---------|----|-----|-----|-----|-----|-----|-----|-----|-----|-----|-----|-----|-----|-----|
| PBO     | n= | 91  | 88  | 82  | 54  | 48  | 39  | 35  | 32  | 32  | 30  | 29  | 29  | 22  |
| MVC QD  | n= | 182 | 180 | 169 | 150 | 143 | 132 | 127 | 124 | 122 | 117 | 115 | 109 | 83  |
| MVC BID | n= | 191 | 182 | 175 | 157 | 149 | 139 | 139 | 133 | 132 | 131 | 131 | 128 | 101 |

### (C) CD4 Cell Count ‡

— Placebo plus OBT      — Maraviroc, once daily plus OBT      — Maraviroc, twice daily plus OBT

#### MOTIVATE 1

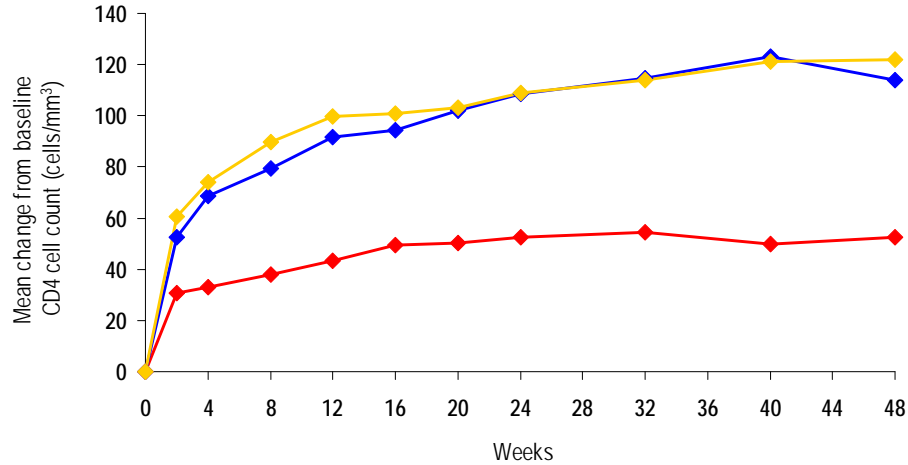

|         |    |     |     |     |     |     |     |     |     |     |
|---------|----|-----|-----|-----|-----|-----|-----|-----|-----|-----|
| PBO     | n= | 105 | 115 | 116 | 116 | 116 | 116 | 116 | 116 | 116 |
| MVC QD  | n= | 203 | 223 | 226 | 227 | 227 | 227 | 227 | 227 | 227 |
| MVC BID | n= | 212 | 228 | 232 | 233 | 233 | 233 | 233 | 233 | 233 |

#### MOTIVATE 2

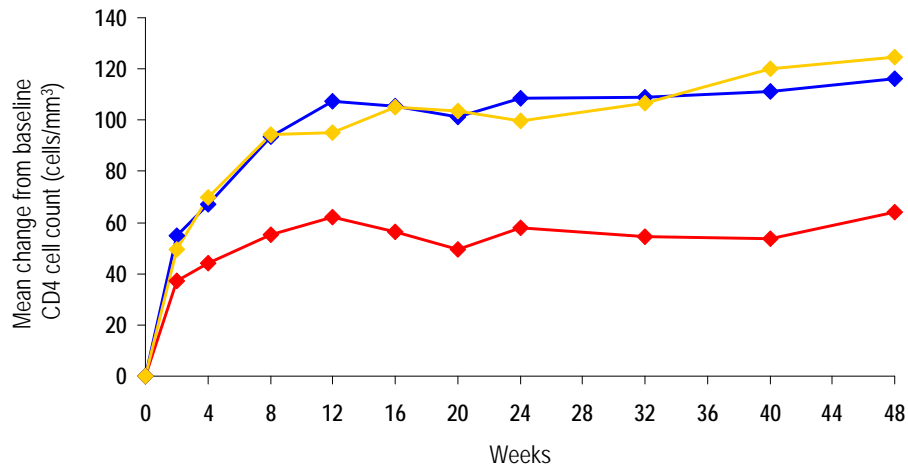

|         |    |     |     |     |     |     |     |     |     |     |
|---------|----|-----|-----|-----|-----|-----|-----|-----|-----|-----|
| PBO     | n= | 81  | 90  | 90  | 90  | 90  | 90  | 90  | 90  | 90  |
| MVC QD  | n= | 159 | 176 | 179 | 180 | 180 | 180 | 180 | 180 | 180 |
| MVC BID | n= | 174 | 184 | 185 | 185 | 185 | 185 | 185 | 185 | 185 |

OBT, optimized background therapy; QD, once daily; BID, twice daily; PBO, placebo; MVC, maraviroc

\* All patients who received at least one dose of study treatment.

† HIV-1 RNA value defined as the baseline level if missing or if patient discontinued before 48 weeks.

‡ Last observation carried forward
